# INFOGRAPHICS IN ANESTHESIOLOGY

Complex Information for Anesthesiologists Presented Quickly and Clearly

## A Tale of Different Populations: Disparities in Obstetric Anesthesia

Neuraxial analgesia is superior to alternatives, yet disparities exist in its use for labor analgesia.<sup>1</sup>

For c-sections, neuraxial analgesia is also preferred. After adjustment for covariates, disparities exist in using general anesthesia for c-sections.<sup>2</sup>

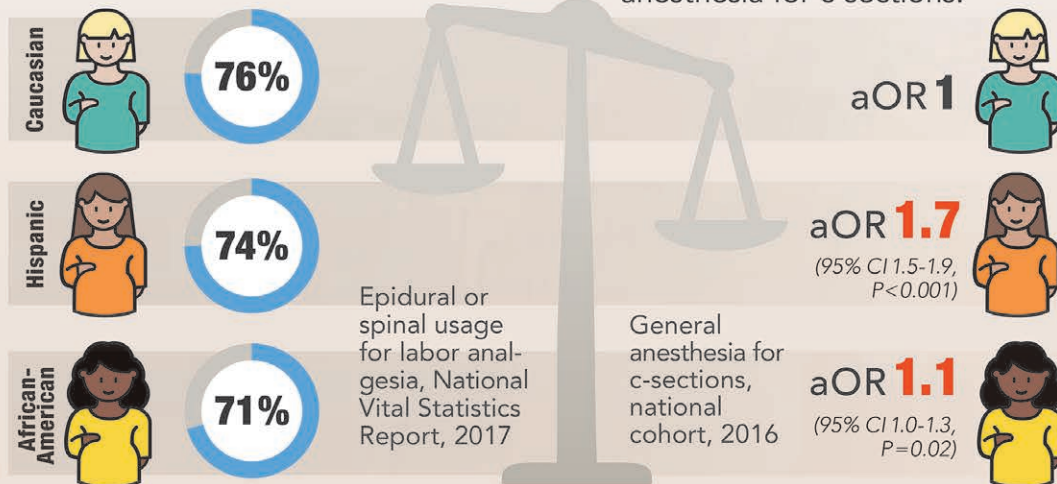

### Possible factors underlying these disparities<sup>3</sup>

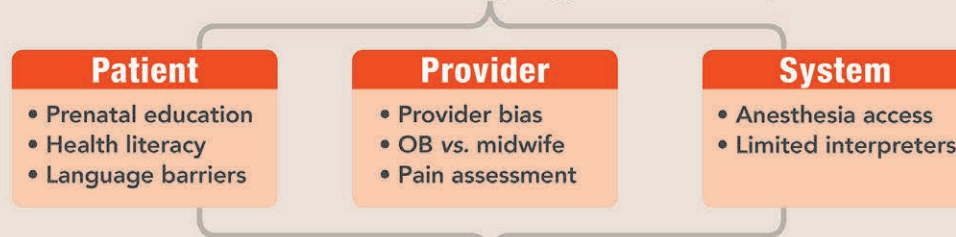

### Possible solutions

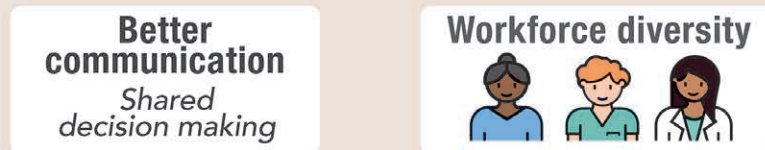

In this issue, Togioka et al.<sup>4</sup> randomized obstetric patients to language-concordant labor analgesia education, which increased epidural usage and reduced misconceptions.

aOR, adjusted odds ratio; c-section, Cesarean section; OB, obstetrician.

Infographic created by Jonathan P. Wanderer, Vanderbilt University Medical Center, and James P. Rathmell, Brigham and Women's Health Care/Harvard Medical School. Illustration by Annemarie Johnson, Vivo Visuals. Address correspondence to Dr. Wanderer: jonathan.p.wanderer@vanderbilt.edu.

1. Martin JA, Hamilton BE, Osterman MJK, Driscoll AK, Drake P: Births: Final data for 2017. National Vital Statistics Reports 67(8). Hyattsville, Maryland, National Center for Health Statistics, 2018
2. Butwick AJ, Blumenfeld YJ, Brookfield KF, Nelson LM, Weiniger CF: Racial and ethnic disparities in mode of anesthesia for cesarean delivery. Anesth Analg 2016; 122:472-9
3. Lange EMS, Rao S, Toledo P: Racial and ethnic disparities in obstetric anesthesia. Semin Perinatol 2017; 41:293-8
4. Togioka BM, Seligman KM, Werntz MK, Yanez ND, Noles LM, Treggiari MM: Education program regarding labor epidurals increases utilization by Hispanic Medicaid beneficiaries: A randomized controlled trial. ANESTHESIOLOGY 2019; 131:840-9
